# Supplementary material for: Microbiological Characterization of the Biofilms Colonizing Bioplastics in Natural Marine Conditions: A Comparison between PHBV and PLA
Source: MDPI journal article supplement (doi:10.3390/microorganisms11061461), 2023-05-31
Supplement: s1 [file s1]

# Microbiological Characterization of the Biofilms Colonizing Bioplastics in Natural Marine Conditions: A Comparison between PHBV and PLA

Anna Marín <sup>1</sup>, Patricia Feijoo <sup>1</sup>, Rosa de Llanos <sup>2</sup>, Belén Carbonetto <sup>3</sup>, Pedro González-Torres <sup>3</sup>, José Tena-Medialdea <sup>4</sup>, José R. García-March <sup>4</sup>, José Gámez-Pérez <sup>1</sup> and Luis Cabedo <sup>1\*</sup>

Number of pages: 4

Number of figures: 4

Number of tables: 1

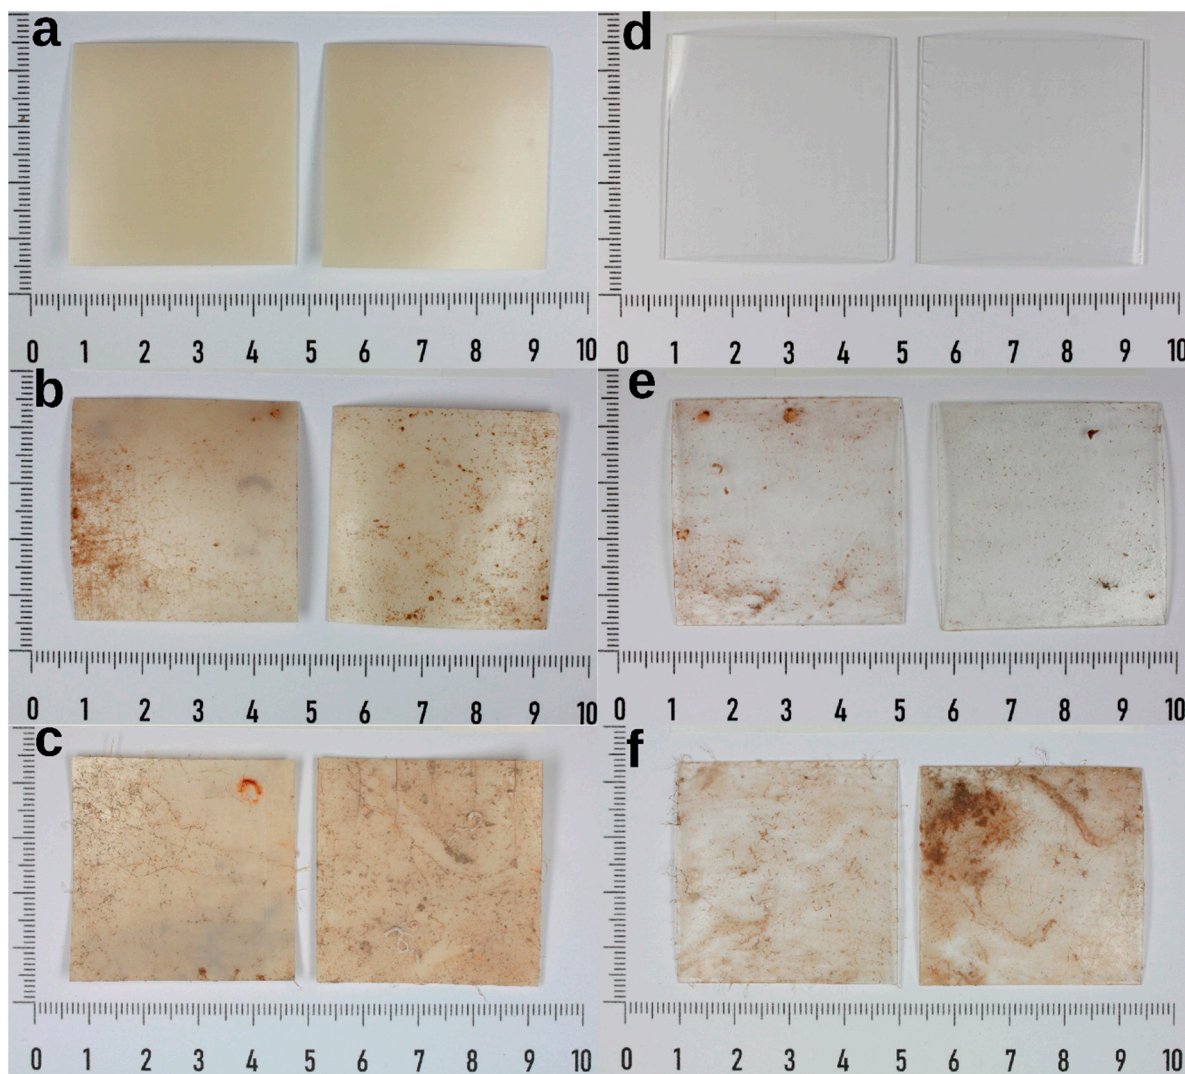

**Figure S1.** Visual aspect of PHBV (a, b, c) and PLA (d, e, f) samples after 0, 1 and 6 months of exposure to a real marine environment.

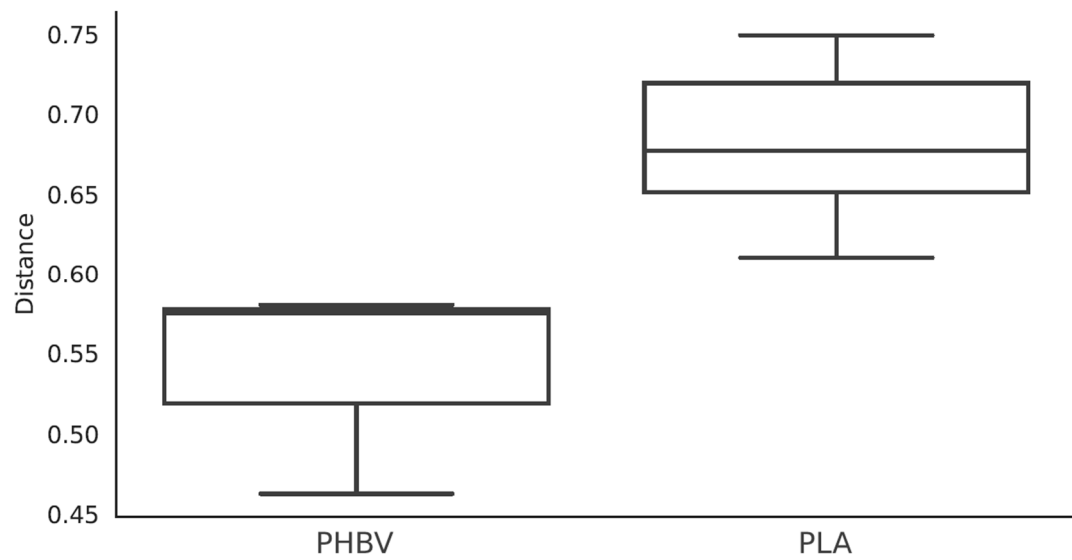

**Figure S2.** Unweighted Unifrac distances within PHVB and between PLA and PHBV microbial communities. Mann Whitney test results show significant differences ( $p < 0.05$ ).

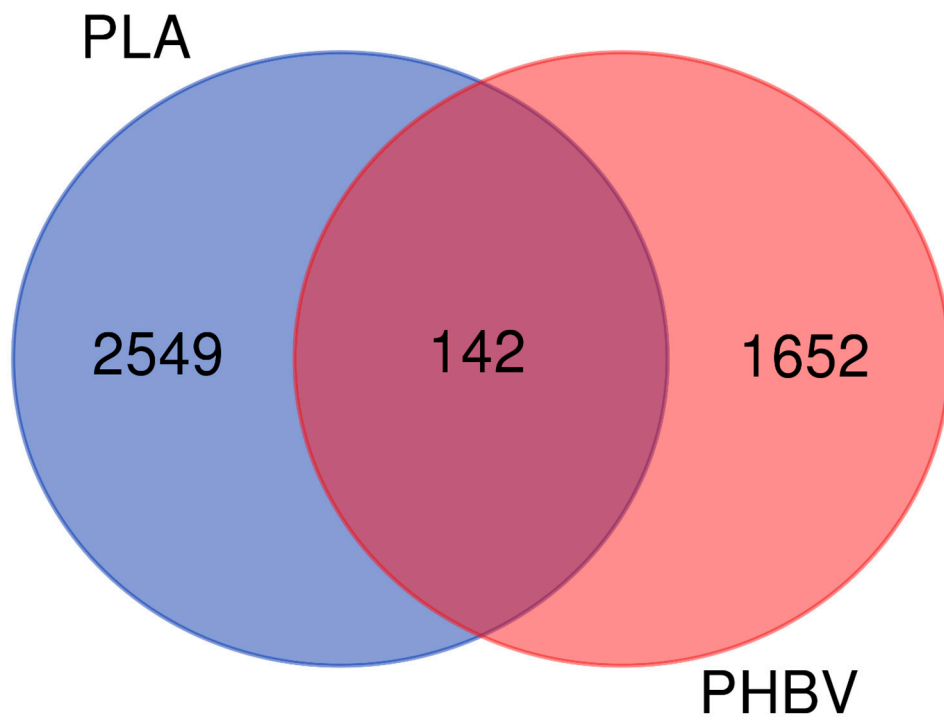

**Figure S3.** Venn diagram showing shared and specific operational taxonomic units (OTUs) present in the biofilms formed on PLA and PHBV samples.

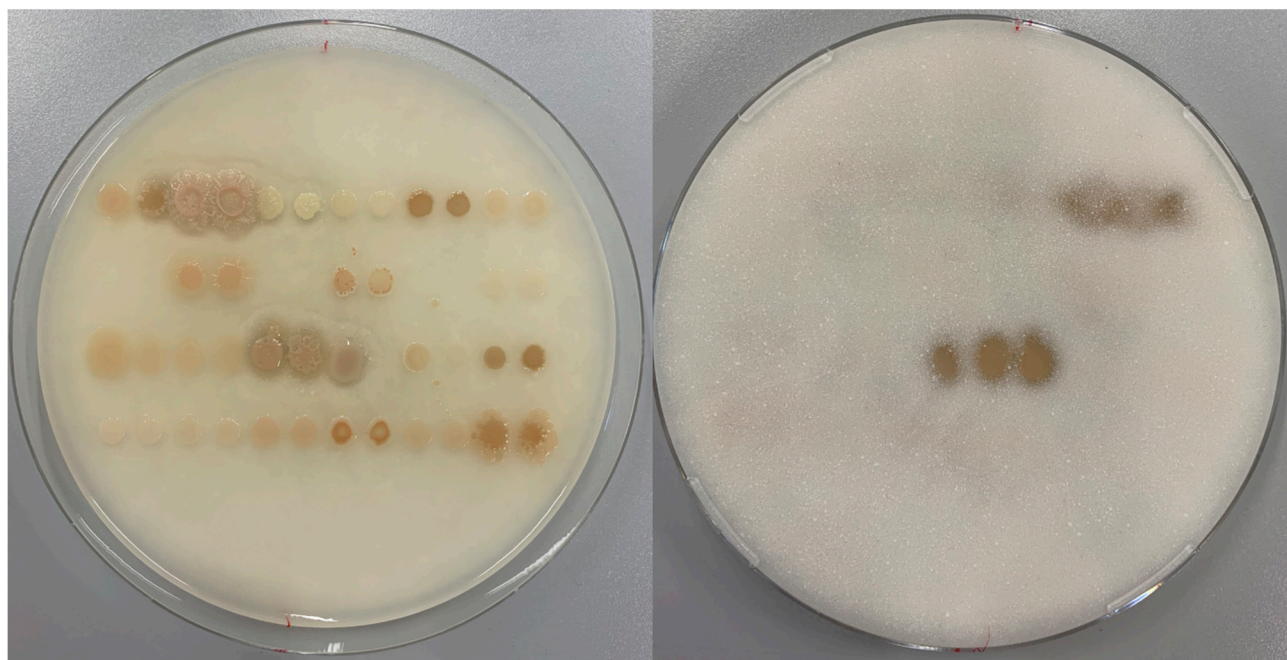

**Figure S4.** Top and bottom side of marine agar supplemented with PHBV plates used for the screening of PHBV-degrading microbes.

**Table S1.** Blast results of the comparison between the 16S rRNA gene sequences from the isolates and the representative sequences of the biofilm derived operational taxonomic units (OTUs).

| Isolate    | Phylotype ID                     | Taxon                     | % Identity | Alignment length | Mismatches | Gap opens | q.start | q.end | s.start | s.end | Evalue | Bit score |
|------------|----------------------------------|---------------------------|------------|------------------|------------|-----------|---------|-------|---------|-------|--------|-----------|
| <b>C2</b>  | 7d119e9798a893c2d997edbf15545dd0 | <i>Ruegeria</i>           | 100        | 399              | 0          | 0         | 191     | 399   | 1       | 0     | 399    | 737       |
| <b>A11</b> | 1460d734d3638e476053a9a7b1d5099a | <i>Vibrio</i>             | 97.66      | 428              | 4          | 5         | 86      | 425   | 1       | 0     | 425    | 730       |
| <b>B1</b>  | 2dd6b48401ed789955e2cad835e9fbc0 | <i>Pseudoalteromonas</i>  | 95.76      | 425              | 14         | 4         | 169     | 423   | 1       | 0     | 423    | 682       |
| <b>B9</b>  | f24e8d1c913ec880d892ab69508f259d | uncultured_ <i>Eionea</i> | 90.40      | 427              | 37         | 4         | 116     | 425   | 1       | 8.37  | 425    | 558       |
